# Supplementary material for: Identification of Somatic Mutations in Plasma Cell-Free DNA from Patients with Metastatic Oral Squamous Cell Carcinoma
Source: MDPI journal article supplement (doi:10.3390/ijms241210408), 2023-06-20
Supplement: s1 [file s1]

## Supplementary Materials

Table S1. Unadjusted and adjusted linear regression predicting change in tumor mutation burden

| Parameter              | Unadjusted analysis |             |                 | Adjusted analysis <sup>a</sup> |             |                 |
|------------------------|---------------------|-------------|-----------------|--------------------------------|-------------|-----------------|
|                        | B                   | 95% CI      | <i>P</i> -value | B                              | 95% CI      | <i>P</i> -value |
| Clinical stage (I-III) |                     |             |                 |                                |             |                 |
| IV                     | 0.157               | -9.03-30.99 | 0.275           | 0.153                          | -9.63-30.94 | 0.296           |
| Metastasis (No)        |                     |             |                 |                                |             |                 |
| Yes                    | 0.312               | 2.71-44.22  | 0.028           | 0.320                          | 3.13-45.07  | 0.025           |

95% CI, 95% confidence interval

B, standardized coefficients

<sup>a</sup>Regression models adjusted by age

Table S2. List of most frequently mutated genes in TCGA-OSCC dataset

| Genes         | Patients | (%)   |
|---------------|----------|-------|
| <i>TP53</i>   | 264      | (68%) |
| <i>TTN</i>    | 163      | (42%) |
| <i>FAT1</i>   | 99       | (26%) |
| <i>CDKN2A</i> | 86       | (22%) |
| <i>MUC16</i>  | 77       | (20%) |
| <i>NOTCH1</i> | 75       | (19%) |
| <i>PIK3CA</i> | 69       | (18%) |
| <i>LRP1B</i>  | 61       | (16%) |
| <i>SYNE1</i>  | 59       | (15%) |
| <i>PCLO</i>   | 58       | (15%) |
| <i>DNAH5</i>  | 55       | (14%) |
| <i>FLG</i>    | 53       | (14%) |
| <i>CSMD3</i>  | 53       | (14%) |
| <i>DST</i>    | 51       | (13%) |
| <i>CASP8</i>  | 51       | (13%) |
| <i>PLEC</i>   | 51       | (13%) |
| <i>KMT2D</i>  | 49       | (13%) |
| <i>AHNAK</i>  | 46       | (12%) |
| <i>HUWE1</i>  | 44       | (11%) |
| <i>USH2A</i>  | 42       | (11%) |
| <i>XIRP2</i>  | 40       | (10%) |
| <i>FAT4</i>   | 38       | (10%) |
| <i>MUC5B</i>  | 38       | (10%) |
| <i>SYNE2</i>  | 36       | (9%)  |
| <i>MACF1</i>  | 36       | (9%)  |
| <i>OBSCN</i>  | 35       | (9%)  |
| <i>RYR2</i>   | 35       | (9%)  |
| <i>AHNAK2</i> | 35       | (9%)  |
| <i>MUC17</i>  | 35       | (9%)  |
| <i>DMD</i>    | 34       | (9%)  |
| <i>RELN</i>   | 34       | (9%)  |
| <i>PCDH15</i> | 33       | (9%)  |
| <i>EP300</i>  | 33       | (9%)  |

Table S3. List of most frequently mutated genes in our cfDNA and TCGA-OSCC dataset

| Genes    | Our study    | TCGA-OSCC    | Genes   | Our study    | TCGA-OSCC    |
|----------|--------------|--------------|---------|--------------|--------------|
|          | Patients (%) | Patients (%) |         | Patients (%) | Patients (%) |
| TTN      | 24 (48%)     | 163 (42%)    | CFAP46  | 16 (32%)     | 7 (2%)       |
| PLEC     | 23 (46%)     | 51 (13%)     | FAT4    | 16 (32%)     | 38 (10%)     |
| SYNE1    | 22 (44%)     | 59 (15%)     | CACNA1B | 16 (32%)     | 14 (4%)      |
| RYR3     | 22 (44%)     | 28 (7%)      | DOCK10  | 16 (32%)     | 6 (2%)       |
| DMD      | 20 (40%)     | 34 (9%)      | POLE    | 16 (32%)     | 8 (2%)       |
| HECTD4   | 20 (40%)     | 19 (5%)      | SBNO2   | 16 (32%)     | 6 (2%)       |
| UBR4     | 19 (38%)     | 19 (5%)      | ZAN     | 16 (32%)     | 15 (4%)      |
| KMT2D    | 19 (38%)     | 49 (13%)     | DOCK2   | 16 (32%)     | 12 (3%)      |
| RYR1     | 19 (38%)     | 27 (7%)      | OTOF    | 16 (32%)     | 11 (3%)      |
| MYCBP2   | 19 (38%)     | 20 (5%)      | ABCC1   | 16 (32%)     | 11 (3%)      |
| NBEAL1   | 19 (38%)     | 11 (3%)      | HERC1   | 15 (30%)     | 18 (5%)      |
| NEB      | 18 (36%)     | 31 (8%)      | TNXB    | 15 (30%)     | 16 (4%)      |
| OBSCN    | 18 (36%)     | 35 (9%)      | SPEN    | 15 (30%)     | 22 (6%)      |
| DNAH10   | 18 (36%)     | 18 (5%)      | VPS13C  | 15 (30%)     | 19 (5%)      |
| SYNE2    | 18 (36%)     | 36 (9%)      | BIRC6   | 15 (30%)     | 18 (5%)      |
| VPS13D   | 18 (36%)     | 29 (7%)      | DNAH1   | 15 (30%)     | 14 (4%)      |
| PKHD1L1  | 18 (36%)     | 30 (8%)      | DYNC1H1 | 15 (30%)     | 23 (6%)      |
| ZFHX4    | 18 (36%)     | 30 (8%)      | MDN1    | 15 (30%)     | 21 (5%)      |
| LRP1B    | 18 (36%)     | 61 (16%)     | ABCA13  | 15 (30%)     | 27 (7%)      |
| USH2A    | 18 (36%)     | 42 (11%)     | MUC5AC  | 15 (30%)     | 17 (4%)      |
| SACS     | 18 (36%)     | 23 (6%)      | DNAH2   | 15 (30%)     | 24 (6%)      |
| KIAA1109 | 17 (34%)     | 22 (6%)      | ABCA2   | 15 (30%)     | 11 (3%)      |
| DNAH9    | 17 (34%)     | 31 (8%)      | AKAP9   | 15 (30%)     | 21 (5%)      |
| TRRAP    | 17 (34%)     | 18 (5%)      | ANK3    | 15 (30%)     | 16 (4%)      |
| DNAH5    | 17 (34%)     | 55 (14%)     | ARFGEF3 | 15 (30%)     | 8 (2%)       |
| CCDC168  | 17 (34%)     | #N/A         | COL11A1 | 15 (30%)     | 30 (8%)      |
| EP400    | 17 (34%)     | 14 (4%)      | KALRN   | 15 (30%)     | 21 (5%)      |
| FLNA     | 17 (34%)     | 19 (5%)      | COL12A1 | 15 (30%)     | 8 (2%)       |
| DNAH11   | 17 (34%)     | 28 (7%)      | DNHD1   | 15 (30%)     | 8 (2%)       |
| FRAS1    | 17 (34%)     | 21 (5%)      | HSPG2   | 15 (30%)     | 19 (5%)      |
| LRP1     | 17 (34%)     | 26 (7%)      | CSMD2   | 15 (30%)     | 19 (5%)      |
| SRRM2    | 17 (34%)     | 14 (4%)      | DCHS1   | 15 (30%)     | 13 (3%)      |
| PRKDC    | 17 (34%)     | 21 (5%)      | DNAH7   | 15 (30%)     | 17 (4%)      |
| ZZEF1    | 17 (34%)     | 12 (3%)      | KMT2C   | 15 (30%)     | 23 (6%)      |
| MGA      | 17 (34%)     | 11 (3%)      | WDFY3   | 15 (30%)     | 14 (4%)      |
| RNF213   | 17 (34%)     | 27 (7%)      | CACNA1D | 15 (30%)     | 15 (4%)      |
| ATM      | 17 (34%)     | 15 (4%)      | COL4A6  | 15 (30%)     | 10 (3%)      |

|        |          |         |           |          |          |
|--------|----------|---------|-----------|----------|----------|
| PLXNA3 | 17 (34%) | 17 (4%) | IGFN1     | 15 (30%) | 5 (1%)   |
| ARID1A | 17 (34%) | 14 (4%) | PLXND1    | 15 (30%) | 7 (2%)   |
| FBN3   | 17 (34%) | 11 (3%) | COL5A3    | 15 (30%) | 10 (3%)  |
| KNTC1  | 17 (34%) | 13 (3%) | SEC16A    | 15 (30%) | 10 (3%)  |
| DOCK7  | 17 (34%) | 11 (3%) | SHANK1    | 15 (30%) | 8 (2%)   |
| TRPM6  | 17 (34%) | 13 (3%) | TRANK1    | 15 (30%) | 12 (3%)  |
| ANK1   | 17 (34%) | 9 (2%)  | CNOT1     | 15 (30%) | 15 (4%)  |
| NFAT5  | 17 (34%) | 8 (2%)  | INTS1     | 15 (30%) | 3 (1%)   |
| ANK2   | 16 (32%) | 18 (5%) | PREX1     | 15 (30%) | 11 (3%)  |
| SSPO   | 16 (32%) | 18 (5%) | BCOR      | 15 (30%) | 4 (1%)   |
| ADGRV1 | 16 (32%) | 24 (6%) | DEPDC5    | 15 (30%) | 7 (2%)   |
| MACF1  | 16 (32%) | 36 (9%) | KIDINS220 | 15 (30%) | 6 (2%)   |
| FAT3   | 16 (32%) | 31 (8%) | MAP1B     | 15 (30%) | 16 (4%)  |
| ADGRG4 | 16 (32%) | 21 (5%) | COL4A4    | 15 (30%) | 7 (2%)   |
| RYR2   | 16 (32%) | 35 (9%) | CREBBP    | 15 (30%) | 27 (7%)  |
| HMCN1  | 16 (32%) | 26 (7%) | KIAA1551  | 15 (30%) | 8 (2%)   |
| STARD9 | 16 (32%) | #N/A    | COL22A1   | 15 (30%) | 27 (7%)  |
| TG     | 16 (32%) | 18 (5%) | CRAMP1    | 15 (30%) | #N/A     |
| LAMA2  | 16 (32%) | 18 (5%) | SHROOM2   | 15 (30%) | 3 (1%)   |
| NSD1   | 16 (32%) | 27 (7%) | CELSR1    | 15 (30%) | 16 (4%)  |
| UNC80  | 16 (32%) | 5 (1%)  | GBF1      | 15 (30%) | 5 (1%)   |
| FBN2   | 16 (32%) | 16 (4%) | MUC5B     | 15 (30%) | 38 (10%) |
| KMT2A  | 16 (32%) | 23 (6%) | NCOR2     | 15 (30%) | 13 (3%)  |
| LYST   | 16 (32%) | 13 (3%) | NOTCH1    | 15 (30%) | 75 (19%) |
| HMCN2  | 16 (32%) | #N/A    | PKD1L2    | 15 (30%) | 13 (3%)  |

---

Table S4. The relationship between metastatic status and mutated genes

| Parameters    |           | Non-metastasis<br>(N=31) | Metastasis<br>(N=9) | P-value <sup>a</sup> |
|---------------|-----------|--------------------------|---------------------|----------------------|
| <i>TTN</i>    | Wide type | 29                       | 2                   | 0.018                |
|               | Mutant    | 12                       | 7                   |                      |
| <i>SYNE1</i>  | Wide type | 29                       | 2                   | 0.018                |
|               | Mutant    | 12                       | 7                   |                      |
| <i>RYR3</i>   | Wide type | 30                       | 2                   | 0.007                |
|               | Mutant    | 11                       | 7                   |                      |
| <i>DMD</i>    | Wide type | 29                       | 2                   | 0.018                |
|               | Mutant    | 12                       | 7                   |                      |
| <i>HECTD4</i> | Wide type | 30                       | 2                   | 0.007                |
|               | Mutant    | 11                       | 7                   |                      |
| <i>KMT2D</i>  | Wide type | 31                       | 1                   | <b>0.001</b>         |
|               | Mutant    | 10                       | 8                   |                      |
| <i>NEB</i>    | Wide type | 31                       | 3                   | 0.022                |
|               | Mutant    | 10                       | 6                   |                      |
| <i>DNAH10</i> | Wide type | 33                       | 1                   | <b>&lt;0.001</b>     |
|               | Mutant    | 8                        | 8                   |                      |
| <i>SYNE2</i>  | Wide type | 33                       | 3                   | 0.009                |
|               | Mutant    | 8                        | 5                   |                      |
| <i>VPS13D</i> | Wide type | 32                       | 2                   | 0.003                |
|               | Mutant    | 9                        | 7                   |                      |
| <i>ZFHX4</i>  | Wide type | 33                       | 3                   | 0.009                |
|               | Mutant    | 8                        | 6                   |                      |
| <i>LRP1B</i>  | Wide type | 31                       | 3                   | 0.022                |
|               | Mutant    | 10                       | 6                   |                      |

<sup>a</sup>P-value were determined with Fisher's exact test

The Bonferroni-adjusted threshold for significance is set at  $\alpha = 0.002$  (0.05/33)

Table S5. List of the 300 most frequent gene

| Gene    | Mutations | Patiets (%) | Gene      | Mutations | Patiets (%) | Gene    | Mutations | Patiets (%) |
|---------|-----------|-------------|-----------|-----------|-------------|---------|-----------|-------------|
| MUC16   | 111       | 23 (48%)    | DNAH7     | 30        | 15 (30%)    | ANKRD24 | 15        | 13 (26%)    |
| TTN     | 116       | 24 (48%)    | GBF1      | 22        | 15 (30%)    | APC     | 15        | 13 (26%)    |
| PLEC    | 51        | 23 (46%)    | HERC1     | 54        | 15 (30%)    | ARID1B  | 21        | 13 (26%)    |
| SYNE1   | 87        | 23 (46%)    | IGFN1     | 28        | 15 (30%)    | ARMCX4  | 24        | 13 (26%)    |
| RYR3    | 62        | 22 (44%)    | IRS2      | 19        | 15 (30%)    | ASCC3   | 21        | 13 (26%)    |
| HECTD4  | 47        | 21 (42%)    | KALRN     | 32        | 15 (30%)    | ATP13A1 | 17        | 13 (26%)    |
| KMT2D   | 62        | 21 (42%)    | KIAA1551  | 24        | 15 (30%)    | ATP7A   | 20        | 13 (26%)    |
| OBSCN   | 78        | 21 (42%)    | KIDINS220 | 25        | 15 (30%)    | BOD1L1  | 21        | 13 (26%)    |
| RYR1    | 51        | 21 (42%)    | KMT2C     | 30        | 15 (30%)    | BRWD1   | 19        | 13 (26%)    |
| UBR4    | 57        | 21 (42%)    | MAP1B     | 25        | 15 (30%)    | BSN     | 29        | 13 (26%)    |
| DMD     | 48        | 20 (40%)    | MDN1      | 39        | 15 (30%)    | BTAF1   | 17        | 13 (26%)    |
| NBEAL1  | 26        | 20 (40%)    | MUC5AC    | 35        | 15 (30%)    | CACNA1F | 25        | 13 (26%)    |
| USH2A   | 37        | 20 (40%)    | MUC5B     | 22        | 15 (30%)    | CACNA1G | 22        | 13 (26%)    |
| LRP1    | 43        | 19 (38%)    | NCOR2     | 22        | 15 (30%)    | CFAP74  | 16        | 13 (26%)    |
| LRP1B   | 44        | 19 (38%)    | NOTCH1    | 22        | 15 (30%)    | CGNL1   | 18        | 13 (26%)    |
| MACF1   | 56        | 19 (38%)    | PKD1L2    | 22        | 15 (30%)    | CHD5    | 19        | 13 (26%)    |
| MYCBP2  | 40        | 19 (38%)    | PLXND1    | 28        | 15 (30%)    | CHD7    | 24        | 13 (26%)    |
| SYNE2   | 53        | 19 (38%)    | PREX1     | 26        | 15 (30%)    | CHD9    | 25        | 13 (26%)    |
| ABCC1   | 24        | 18 (36%)    | SEC16A    | 27        | 15 (30%)    | COL6A3  | 27        | 13 (26%)    |
| ATM     | 36        | 18 (36%)    | SHANK1    | 27        | 15 (30%)    | COL6A5  | 25        | 13 (26%)    |
| DNAH1   | 50        | 18 (36%)    | SHROOM2   | 23        | 15 (30%)    | CSPG4   | 18        | 13 (26%)    |
| DNAH10  | 44        | 18 (36%)    | SPEN      | 40        | 15 (30%)    | CUX1    | 20        | 13 (26%)    |
| DNAH11  | 39        | 18 (36%)    | TNXB      | 44        | 15 (30%)    | DNAH14  | 20        | 13 (26%)    |
| DNHD1   | 39        | 18 (36%)    | TRANK1    | 27        | 15 (30%)    | DNAH3   | 20        | 13 (26%)    |
| FAT4    | 35        | 18 (36%)    | USP25     | 21        | 15 (30%)    | DOPEY2  | 32        | 13 (26%)    |
| INTS1   | 30        | 18 (36%)    | VPS13C    | 40        | 15 (30%)    | DYSF    | 27        | 13 (26%)    |
| MUC19   | 57        | 18 (36%)    | WDFY3     | 30        | 15 (30%)    | EML5    | 17        | 13 (26%)    |
| MYO9B   | 26        | 18 (36%)    | ABCA1     | 24        | 14 (28%)    | ERBB4   | 16        | 13 (26%)    |
| NEB     | 55        | 18 (36%)    | ALMS1     | 28        | 14 (28%)    | FAT2    | 26        | 13 (26%)    |
| PKHD1L1 | 42        | 18 (36%)    | ARFGEF2   | 27        | 14 (28%)    | FBF1    | 16        | 13 (26%)    |
| SACS    | 26        | 18 (36%)    | BICRA     | 17        | 14 (28%)    | FBN1    | 28        | 13 (26%)    |
| VPS13D  | 44        | 18 (36%)    | BPTF      | 22        | 14 (28%)    | FMNL3   | 17        | 13 (26%)    |
| ZFHX4   | 38        | 18 (36%)    | C3        | 24        | 14 (28%)    | FNIP1   | 18        | 13 (26%)    |
| ANK1    | 22        | 17 (34%)    | CDH23     | 37        | 14 (28%)    | FRY     | 33        | 13 (26%)    |
| ARID1A  | 32        | 17 (34%)    | CEP350    | 30        | 14 (28%)    | FRYL    | 25        | 13 (26%)    |
| CCDC168 | 41        | 17 (34%)    | CMYA5     | 30        | 14 (28%)    | FYCO1   | 17        | 13 (26%)    |
| CELSR1  | 34        | 17 (34%)    | CSF3R     | 16        | 14 (28%)    | GAPVD1  | 18        | 13 (26%)    |
| DNAH5   | 42        | 17 (34%)    | CSMD1     | 40        | 14 (28%)    | GEMIN5  | 21        | 13 (26%)    |
| DNAH9   | 44        | 17 (34%)    | CTTNBP2   | 17        | 14 (28%)    | GOLGA4  | 18        | 13 (26%)    |
| DOCK7   | 24        | 17 (34%)    | CUBN      | 27        | 14 (28%)    | GOLGB1  | 25        | 13 (26%)    |
| EP400   | 37        | 17 (34%)    | CUL9      | 25        | 14 (28%)    | HIVEP1  | 24        | 13 (26%)    |

|          |    |          |         |    |          |          |    |          |
|----------|----|----------|---------|----|----------|----------|----|----------|
| FBN3     | 29 | 17 (34%) | DIP2A   | 24 | 14 (28%) | HKR1     | 16 | 13 (26%) |
| FLNA     | 37 | 17 (34%) | DNAH12  | 31 | 14 (28%) | HTT      | 25 | 13 (26%) |
| FRAS1    | 36 | 17 (34%) | DNAH17  | 30 | 14 (28%) | HUWE1    | 50 | 13 (26%) |
| KIAA1109 | 45 | 17 (34%) | DOT1L   | 21 | 14 (28%) | IGF2R    | 20 | 13 (26%) |
| KNTC1    | 28 | 17 (34%) | DSCAML1 | 21 | 14 (28%) | IQGAP3   | 16 | 13 (26%) |
| MGA      | 34 | 17 (34%) | DST     | 44 | 14 (28%) | ITPR1    | 26 | 13 (26%) |
| NBEAL2   | 34 | 17 (34%) | ELP1    | 20 | 14 (28%) | KAT6B    | 24 | 13 (26%) |
| NFAT5    | 22 | 17 (34%) | FCGBP   | 28 | 14 (28%) | KIAA1217 | 24 | 13 (26%) |
| PLXNA3   | 33 | 17 (34%) | FLNB    | 24 | 14 (28%) | KIAA1549 | 24 | 13 (26%) |
| PRKDC    | 35 | 17 (34%) | GREB1   | 18 | 14 (28%) | KIF13A   | 16 | 13 (26%) |
| RNF213   | 34 | 17 (34%) | GSE1    | 24 | 14 (28%) | KNL1     | 24 | 13 (26%) |
| SRRM2    | 36 | 17 (34%) | HCFC1   | 34 | 14 (28%) | LAMA3    | 28 | 13 (26%) |
| TRPM6    | 24 | 17 (34%) | HECTD1  | 22 | 14 (28%) | LOXHD1   | 26 | 13 (26%) |
| TRRAP    | 43 | 17 (34%) | HELZ2   | 19 | 14 (28%) | MAP2     | 20 | 13 (26%) |
| ZZEF1    | 35 | 17 (34%) | HERC2   | 32 | 14 (28%) | MED12    | 22 | 13 (26%) |
| ADGRG4   | 41 | 16 (32%) | HIVEP3  | 29 | 14 (28%) | MUC4     | 26 | 13 (26%) |
| ADGRV1   | 48 | 16 (32%) | ITPR2   | 23 | 14 (28%) | MYO16    | 26 | 13 (26%) |
| ANK2     | 49 | 16 (32%) | KAT6A   | 22 | 14 (28%) | MYO5A    | 18 | 13 (26%) |
| CACNA1B  | 25 | 16 (32%) | KIF1A   | 23 | 14 (28%) | MYO7A    | 27 | 13 (26%) |
| CFAP46   | 29 | 16 (32%) | KIF26A  | 19 | 14 (28%) | NCOR1    | 26 | 13 (26%) |
| DOCK10   | 24 | 16 (32%) | KMT2B   | 24 | 14 (28%) | NEXMIF   | 24 | 13 (26%) |
| DOCK2    | 22 | 16 (32%) | LMTK3   | 21 | 14 (28%) | NIPBL    | 28 | 13 (26%) |
| FAT3     | 44 | 16 (32%) | LTBP4   | 22 | 14 (28%) | NRAP     | 16 | 13 (26%) |
| FBN2     | 32 | 16 (32%) | MED1    | 18 | 14 (28%) | NUP133   | 16 | 13 (26%) |
| HMCN1    | 39 | 16 (32%) | MED13L  | 33 | 14 (28%) | NUP210   | 21 | 13 (26%) |
| HMCN2    | 41 | 16 (32%) | MEGF8   | 24 | 14 (28%) | NUP214   | 24 | 13 (26%) |
| HSPG2    | 39 | 16 (32%) | MN1     | 15 | 14 (28%) | OTOGL    | 21 | 13 (26%) |
| KMT2A    | 32 | 16 (32%) | MPRIIP  | 19 | 14 (28%) | PCLO     | 34 | 13 (26%) |
| LAMA2    | 36 | 16 (32%) | MTOR    | 20 | 14 (28%) | PHKB     | 18 | 13 (26%) |
| LYST     | 32 | 16 (32%) | MUC17   | 45 | 14 (28%) | PHLPP1   | 22 | 13 (26%) |
| NSD1     | 35 | 16 (32%) | MXRA5   | 26 | 14 (28%) | PIEZO2   | 26 | 13 (26%) |
| OTOF     | 20 | 16 (32%) | MYO10   | 28 | 14 (28%) | PLXNB3   | 16 | 13 (26%) |
| POLE     | 24 | 16 (32%) | MYO15B  | 26 | 14 (28%) | PLXNC1   | 18 | 13 (26%) |
| RAI1     | 22 | 16 (32%) | NAV3    | 20 | 14 (28%) | PRAG1    | 17 | 13 (26%) |
| RYR2     | 40 | 16 (32%) | NBAS    | 27 | 14 (28%) | PRRC2C   | 24 | 13 (26%) |
| SBNO2    | 24 | 16 (32%) | NHS     | 23 | 14 (28%) | QRICH2   | 23 | 13 (26%) |
| SSPO     | 49 | 16 (32%) | NOTCH2  | 24 | 14 (28%) | RALGAPA2 | 21 | 13 (26%) |
| STARD9   | 38 | 16 (32%) | NOTCH4  | 23 | 14 (28%) | RAPGEF2  | 19 | 13 (26%) |
| TG       | 37 | 16 (32%) | PCNT    | 33 | 14 (28%) | RERE     | 18 | 13 (26%) |
| UNC80    | 34 | 16 (32%) | PDZD2   | 25 | 14 (28%) | RREB1    | 20 | 13 (26%) |
| ZAN      | 23 | 16 (32%) | PI4KA   | 20 | 14 (28%) | SAMD9    | 15 | 13 (26%) |
| ABCA13   | 38 | 15 (30%) | PRR12   | 23 | 14 (28%) | SDK1     | 23 | 13 (26%) |
| ABCA2    | 33 | 15 (30%) | PTPRF   | 27 | 14 (28%) | SETD2    | 23 | 13 (26%) |

|         |    |          |         |    |          |         |    |          |
|---------|----|----------|---------|----|----------|---------|----|----------|
| AKAP9   | 33 | 15 (30%) | REV3L   | 30 | 14 (28%) | SIPA1L3 | 21 | 13 (26%) |
| ANK3    | 33 | 15 (30%) | RSF1    | 16 | 14 (28%) | SMG1    | 27 | 13 (26%) |
| ARFGEF3 | 32 | 15 (30%) | SHANK3  | 19 | 14 (28%) | SPEG    | 19 | 13 (26%) |
| ATP2B3  | 18 | 15 (30%) | SOGA1   | 22 | 14 (28%) | SPTBN1  | 32 | 13 (26%) |
| BCOR    | 25 | 15 (30%) | SPTA1   | 25 | 14 (28%) | SPTBN2  | 22 | 13 (26%) |
| BIRC6   | 39 | 15 (30%) | TBCD    | 18 | 14 (28%) | SPTBN5  | 18 | 13 (26%) |
| CACNA1D | 29 | 15 (30%) | TENM1   | 18 | 14 (28%) | SVEP1   | 18 | 13 (26%) |
| CNOT1   | 26 | 15 (30%) | TENM4   | 27 | 14 (28%) | TAF1    | 24 | 13 (26%) |
| COL11A1 | 32 | 15 (30%) | TRIP11  | 18 | 14 (28%) | TAOK2   | 16 | 13 (26%) |
| COL12A1 | 31 | 15 (30%) | USP24   | 31 | 14 (28%) | TCF20   | 21 | 13 (26%) |
| COL22A1 | 23 | 15 (30%) | UTRN    | 35 | 14 (28%) | THADA   | 20 | 13 (26%) |
| COL4A4  | 24 | 15 (30%) | VWF     | 34 | 14 (28%) | TLN1    | 17 | 13 (26%) |
| COL4A6  | 28 | 15 (30%) | ZFYVE26 | 26 | 14 (28%) | TLN2    | 23 | 13 (26%) |
| COL5A3  | 27 | 15 (30%) | ZNF236  | 23 | 14 (28%) | TNRC18  | 26 | 13 (26%) |
| CRAMP1  | 23 | 15 (30%) | A2ML1   | 18 | 13 (26%) | TRPM7   | 19 | 13 (26%) |
| CREBBP  | 24 | 15 (30%) | ABCC6   | 25 | 13 (26%) | TSHZ1   | 19 | 13 (26%) |
| CSMD2   | 30 | 15 (30%) | AFF2    | 19 | 13 (26%) | URB2    | 19 | 13 (26%) |
| DCHS1   | 30 | 15 (30%) | AHNAK   | 21 | 13 (26%) | VPS13B  | 32 | 13 (26%) |
| DEPDC5  | 25 | 15 (30%) | AHNAK2  | 56 | 13 (26%) | ZFHX2   | 21 | 13 (26%) |
| DNAH2   | 34 | 15 (30%) | ANKRD11 | 30 | 13 (26%) | ZNF106  | 27 | 13 (26%) |
| DYNC1H1 | 39 | 15 (30%) | ANKZF1  | 15 | 13 (26%) | ZNF628  | 16 | 13 (26%) |

---



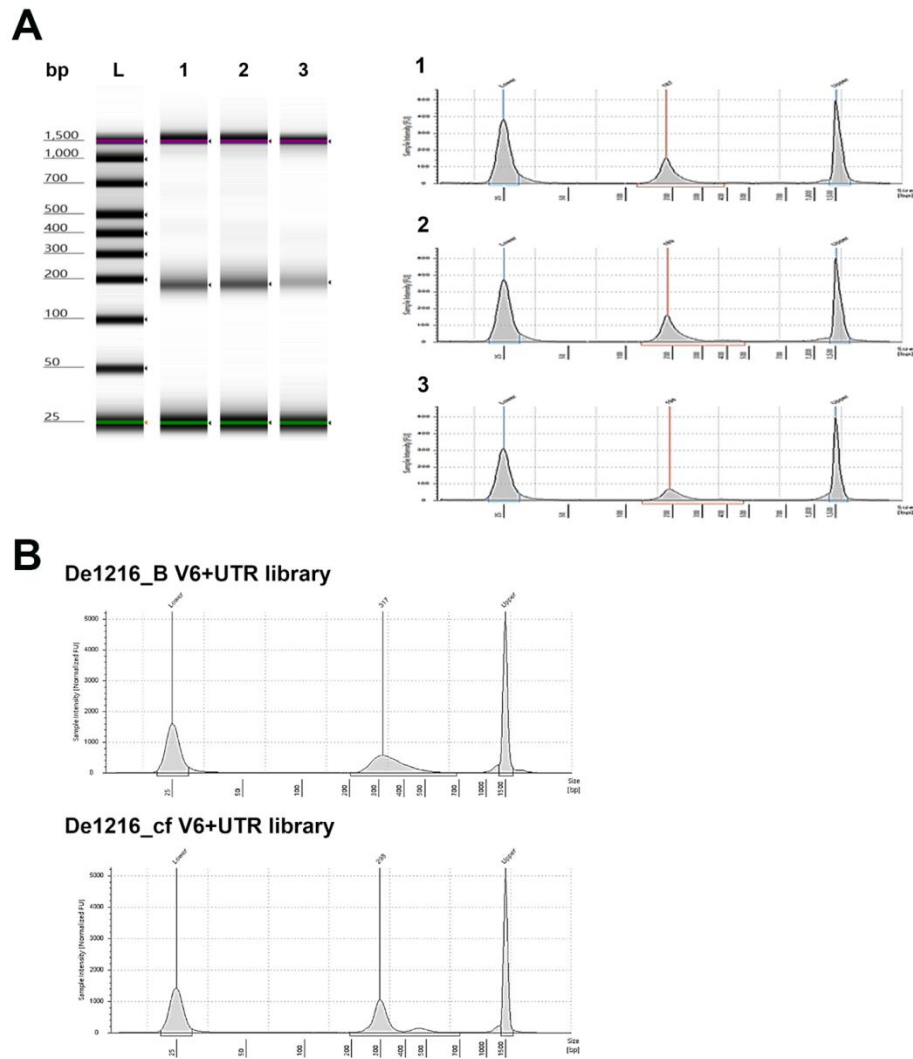

Figure S1. Agilent TapeStation analysis of the DNA integrity in cfDNA and matched normal samples. (A) Electropherogram and gel image of cfDNA and paired normal DNA in 50 patients with OSCC. (B) Representative electropherogram of DNA libraries sizes.

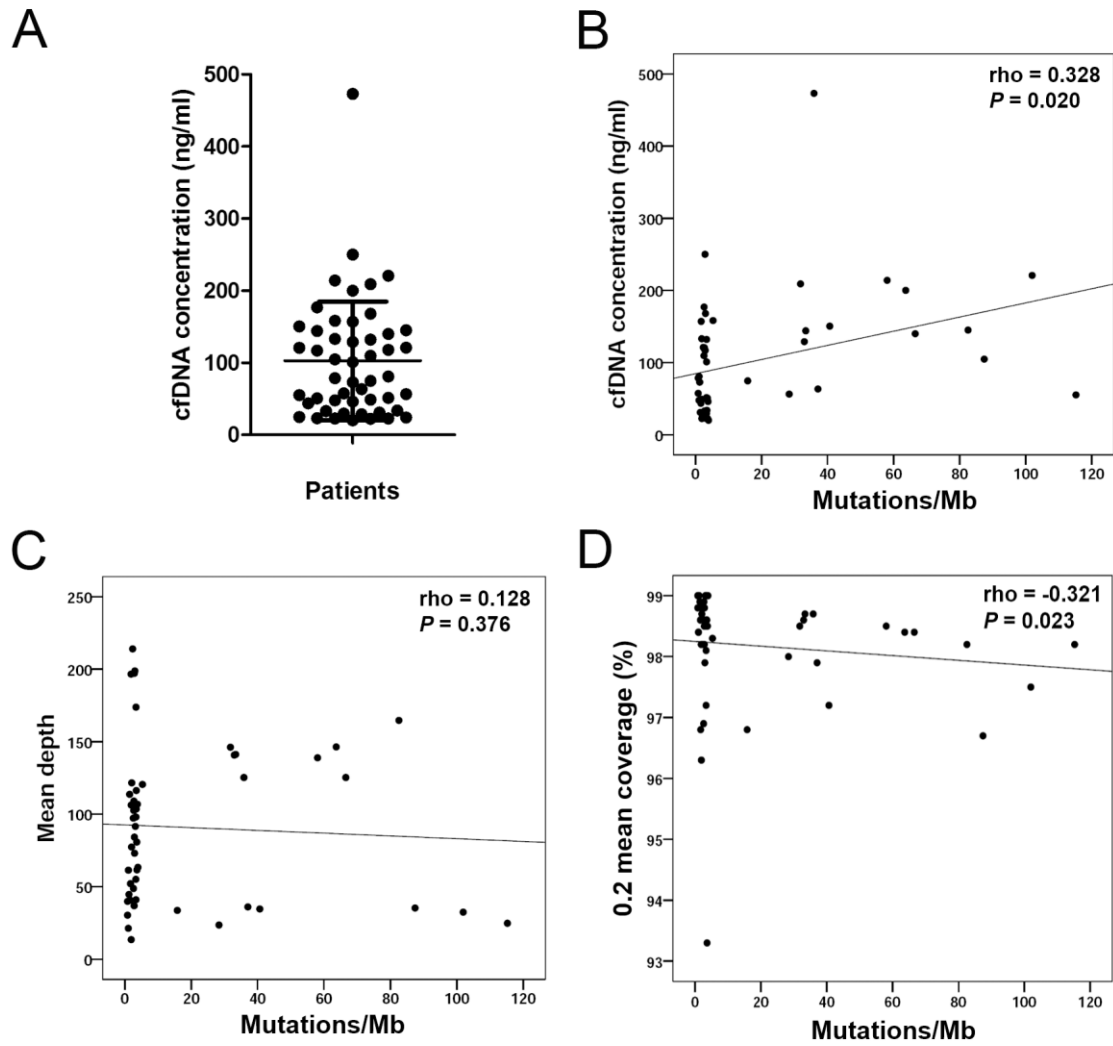

Figure S2. cfDNA mutation burden was correlated with cfDNA concentration, depth, and coverage. (A) Distribution of plasma cfDNA levels in patients with OSCC. cfDNA mutation burden was correlated with (B) cfDNA concentration, (C) mean depth, and (D) 0.2× mean coverage.

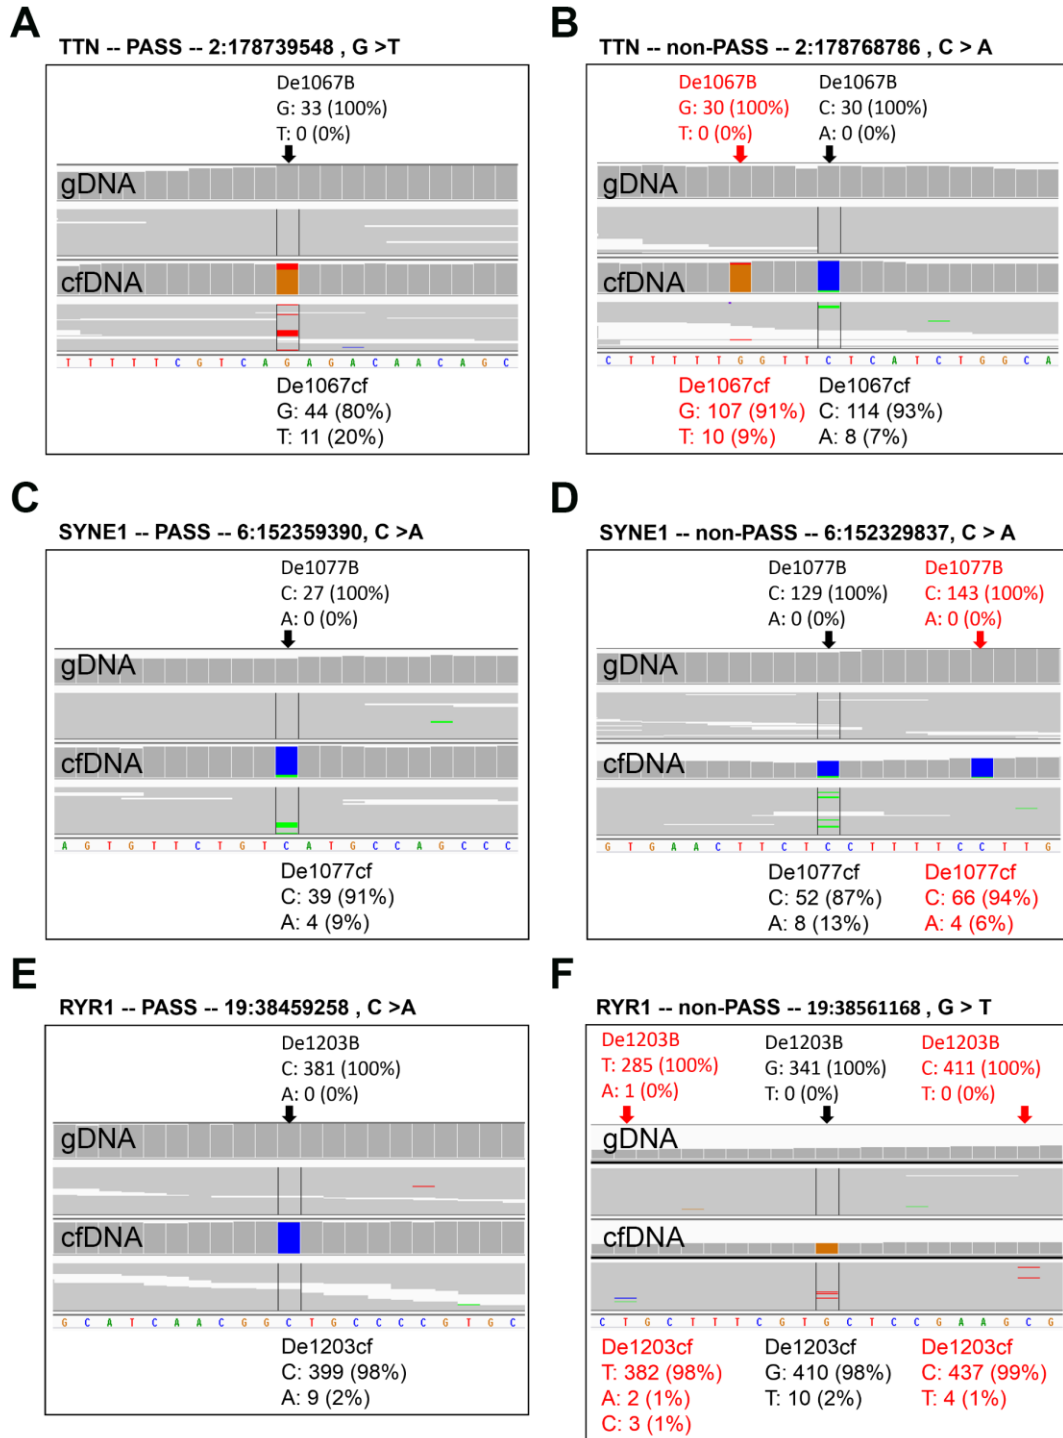

Figure S3. Visual verification of mutations in cfDNA using IGV. IGV PASS variants were detected in (A) *TNN*, (C) *SYNE2*, and (E) *RYR1*. IGV screenshot showing a variant with >2 mismatches within a 20 bp window in (B) *TNN*, (D) *SYNE2*, and (F) *RYR1*. These variants were considered false-positive mutations. Black arrows indicate the positions of the mutations. Red arrows indicate the positions of polymorphisms.

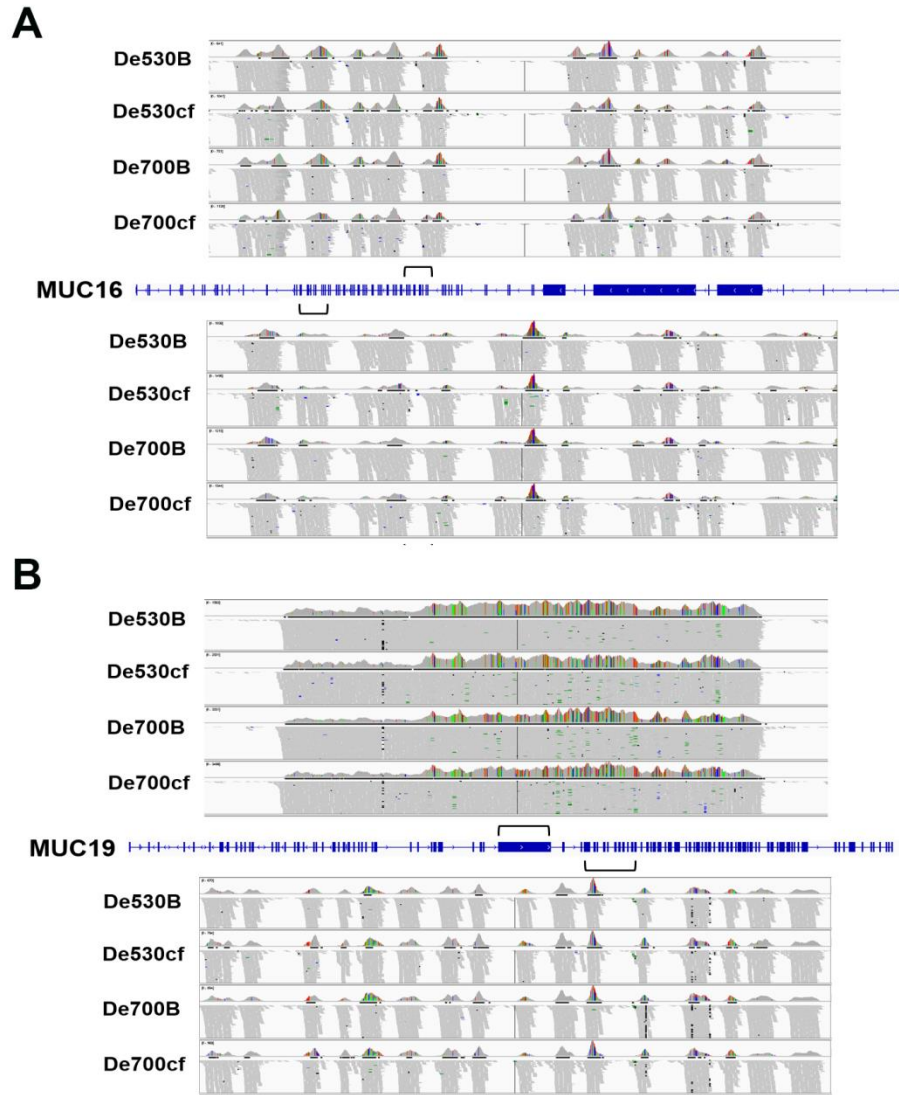

Figure S4. Recurrent false positives in *MUC16* and *MUC19* were detected in cfDNA sequencing. IGV screenshots show that many variants were detected in (A) the *MUC16* locus and (B) the *MUC19* locus in normal and tumor samples. Patients De530 and De700 are shown as representative patients, although other patients showed the same trend.

A

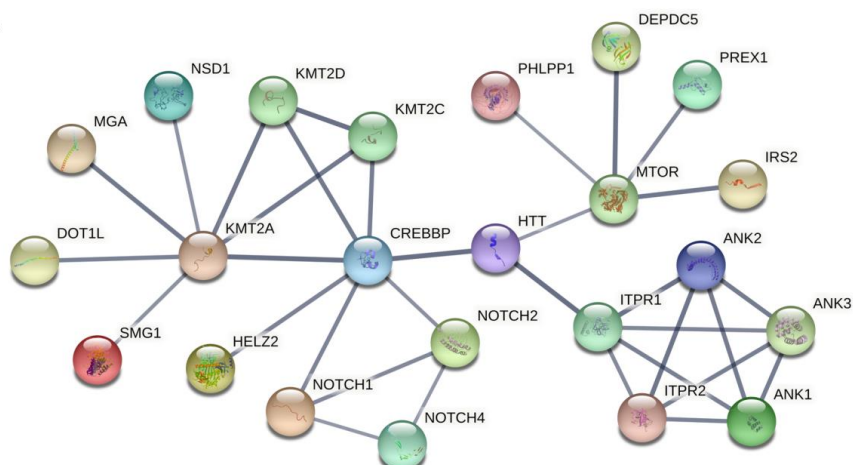

B

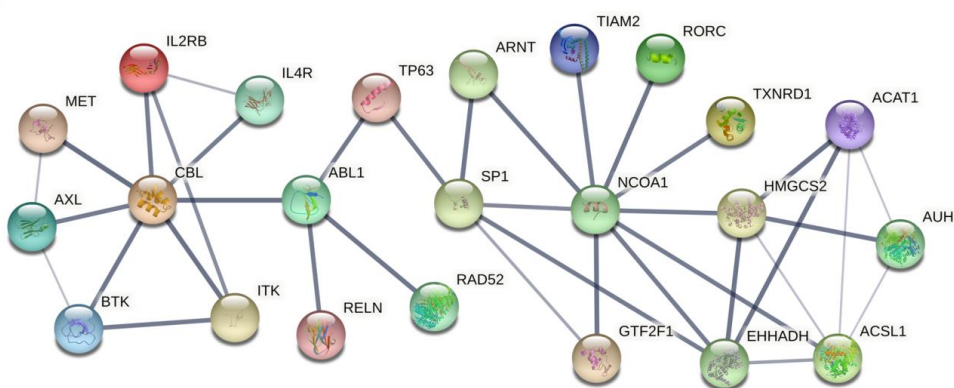

C

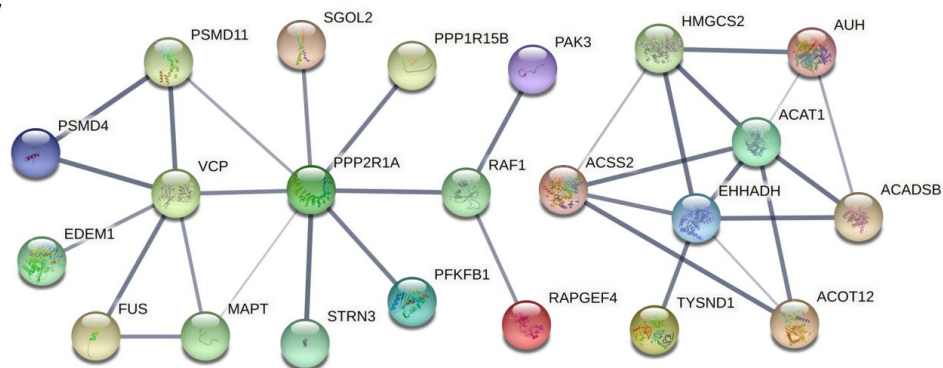

Figure S5. Simplified schematic representation of protein-protein interaction network analysis of mutated genes constructed using STRING. The interaction network was constructed based on the 300 most frequently mutated genes in (A) all patients, (B) patients with metastatic OSCC, and (C) expired patients. Line thickness indicates the strength of data support from text mining, experiments, databases, coexpression, neighborhood, gene fusion, and co-occurrence with a cutoff value of high confidence (0.7).

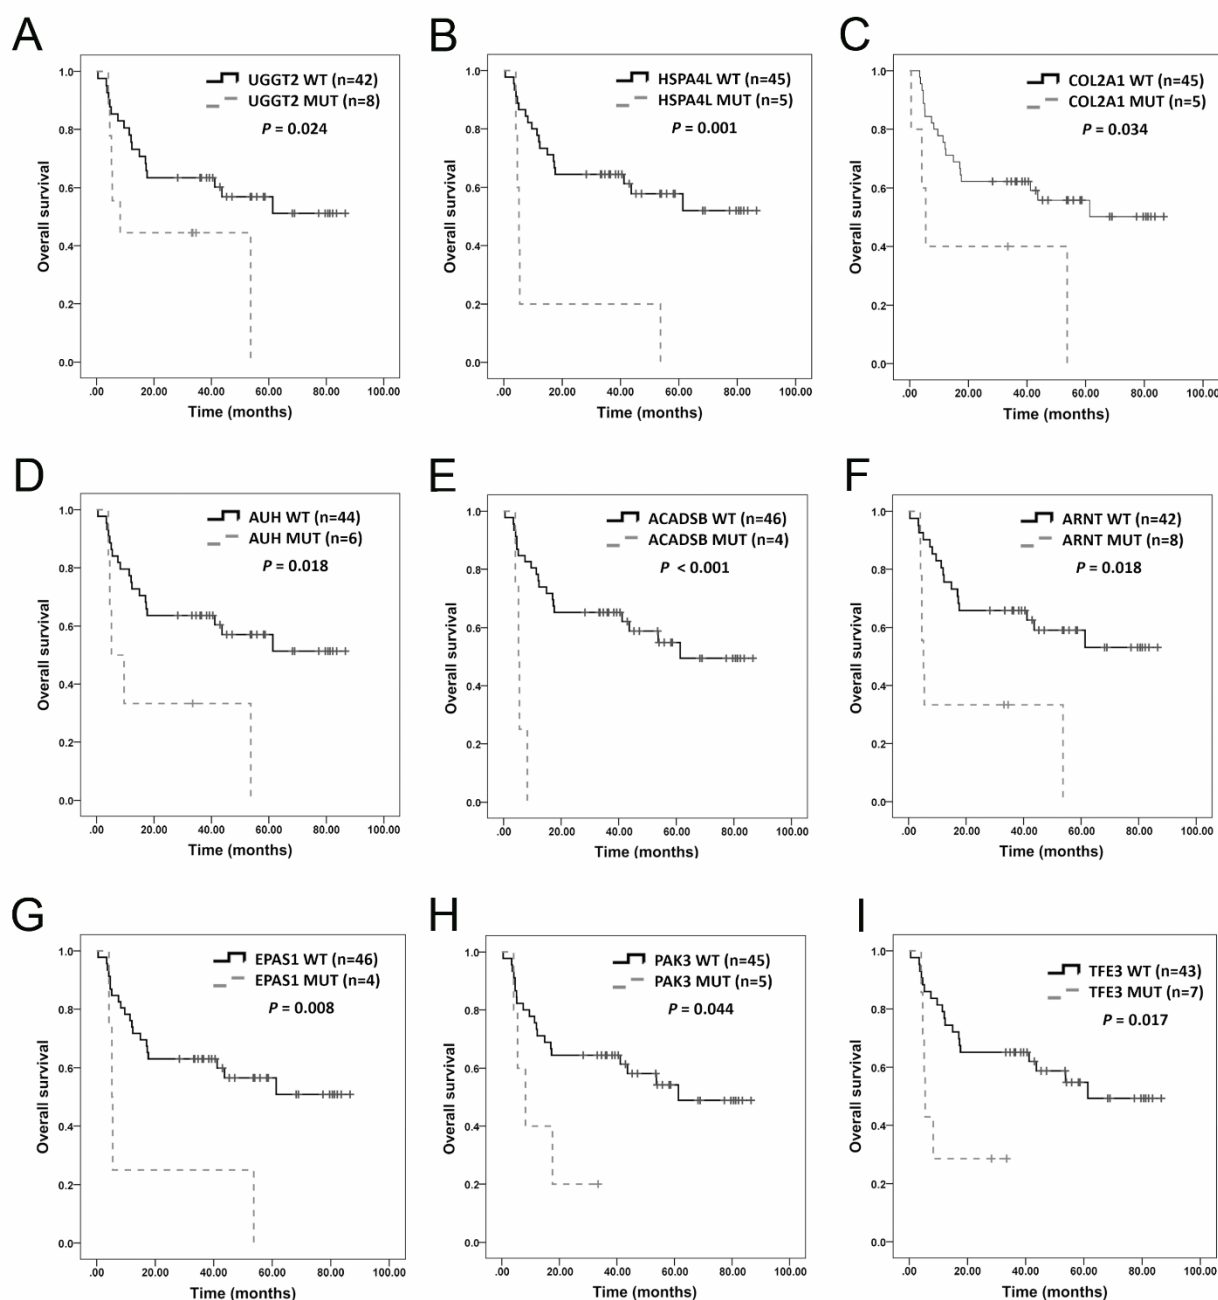

Figure S6. Survival analysis of candidate genes in patients with OSCC. Kaplan-Meier plots for overall survival in patients with metastatic OSCC based on (A) *UGGT2* mutation and (B) *HSPA4L* mutation status. Kaplan-Meier plots for overall survival in expired patients based on (C) *COL2A1*, (D) *AUH*, (E) *ACADSB*, (F) *ARNT*, (G) *EPAS1*, (H) *PAK3*, and (I) *TFE3* mutation status. The Bonferroni-adjusted threshold for significance is set at  $\alpha = 0.006$  (0.05/9).

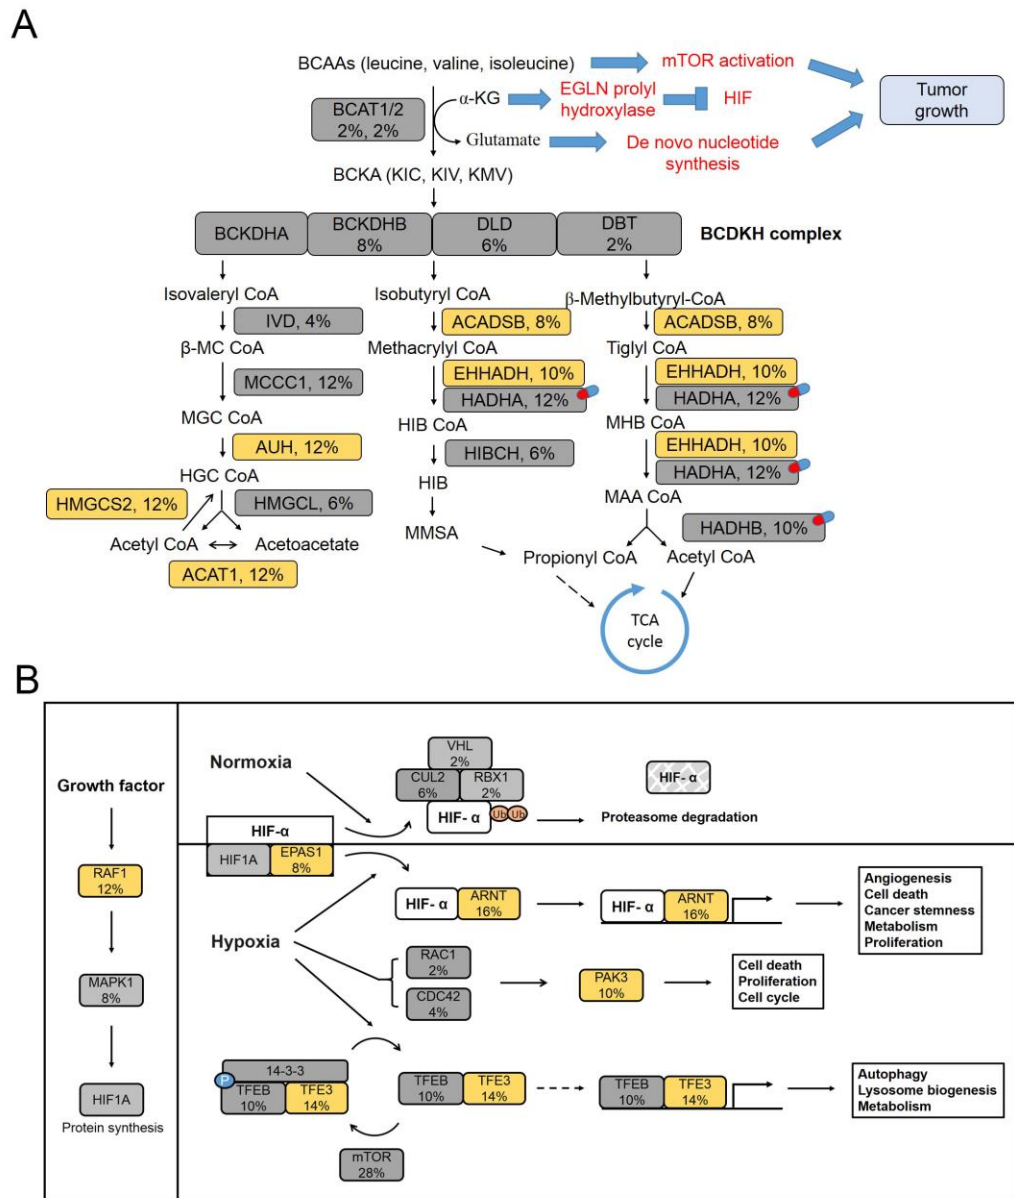

Figure S7. Mutation rates of the major altered genes in significantly altered pathways. The (A) BCAA catabolism and (B) hypoxia-related pathways were identified via KEGG pathway analysis in DAVID. Pill illustrations show FDA-approved drugs that target *HADHA* and *HADHB*. Genes were assigned to each pathway and are shown with their mutation frequencies (orange font: top 300 frequently mutated genes in expired patients that were subjected to KEGG pathway analysis; gray font: genes were not subjected to KEGG pathway analysis).
